# Supplementary material
Source: PubMed Central journal article supplement (PMC2718172)
Supplement: mmc1.pdf [file mmc1.pdf]

Biophysical Journal, Volume 97

**Supporting Material**

**Comparison of Methods for Characterizing Non-ideal Solute Self-Association by Sedimentation Equilibrium**

David J. Scott and Donald J. Winzor

**TABLE S1 Summary of the best-fit estimates of the activity coefficient parameter  $BM_A$  and dimerization constant  $K_2$  obtained from simulated sedimentation equilibrium distributions by two analytical solutions incorporating the Adams–Fujita approach to allowance for thermodynamic non-ideality**

| $K_2$ ( $M^{-1}$ ) | Run* | Analysis via Eq. 17 |                                 | Analysis via Eq. 18 |                                 |
|--------------------|------|---------------------|---------------------------------|---------------------|---------------------------------|
|                    |      | $BM_A$ (L/g)        | $K_2$ ( $M^{-1}$ ) <sup>†</sup> | $BM_A$ (L/g)        | $K_2$ ( $M^{-1}$ ) <sup>†</sup> |
| 800                | A    | NV                  |                                 | 0.01184             | 815 ( $\pm$ 13)                 |
|                    | B    | 0.007724            | 599 ( $\pm$ 12)                 | 0.009328            | 679 ( $\pm$ 13)                 |
| 900                | A    | 0.007765            | 690 ( $\pm$ 11)                 | 0.01109             | 886 ( $\pm$ 13)                 |
|                    | B    | 0.009700            | 804 ( $\pm$ 13)                 | 0.01111             | 877 ( $\pm$ 13)                 |
| 1000               | A    | 0.008353            | 812 ( $\pm$ 12)                 | 0.01115             | 990 ( $\pm$ 13)                 |
|                    | B    | 0.006639            | 744 ( $\pm$ 12)                 | 0.007452            | 792 ( $\pm$ 13)                 |
| 1200               | A    | 0.007795            | 985 ( $\pm$ 13)                 | 0.009689            | 1117 ( $\pm$ 14)                |
|                    | B    | 0.008504            | 1033 ( $\pm$ 13)                | 0.009033            | 1065 ( $\pm$ 13)                |
| 1500               | A    | 0.008187            | 1296 ( $\pm$ 13)                | 0.009291            | 1386 ( $\pm$ 14)                |
|                    | B    | 0.009456            | 1398 ( $\pm$ 14)                | 0.009698            | 1415 ( $\pm$ 14)                |
| 1800               | A    | 0.008913            | 1645 ( $\pm$ 14)                | 0.009553            | 1707 ( $\pm$ 14)                |
|                    | B    | 0.008813            | 1636 ( $\pm$ 14)                | 0.009272            | 1673 ( $\pm$ 14)                |

\*Designated as in Fig. 2.

<sup>†</sup>Numbers in parentheses denote twice the standard deviation of the estimate.

<sup>‡</sup>No minimum observed in the sum of squares of residuals.

**TABLE S2 Comparison of activity coefficients for mixtures of uncharged monomer (A) and dimer (P) calculated on the basis of standard statistical-mechanical considerations and scaled particle theory**

| $c_A$ (g/L) | $c_P$ (g/L) | McMillan–Mayer |            |                         | Scaled particle theory |                    |                         |
|-------------|-------------|----------------|------------|-------------------------|------------------------|--------------------|-------------------------|
|             |             | $\gamma_A$     | $\gamma_P$ | $\gamma_P / \gamma_A^2$ | $\gamma_A$             | $\gamma_P$         | $\gamma_P / \gamma_A^2$ |
| 7           | 1           | 1.104*         | 1.154*     | 0.947                   | 1.107 <sup>†</sup>     | 1.158 <sup>†</sup> | 0.945                   |
| 6           | 2           | 1.100          | 1.147      | 0.948                   | 1.103                  | 1.151              | 0.946                   |
| 5           | 3           | 1.097          | 1.141      | 0.948                   | 1.099                  | 1.144              | 0.947                   |
| 4           | 4           | 1.093          | 1.134      | 0.949                   | 1.095                  | 1.138              | 0.949                   |
| 3           | 5           | 1.089          | 1.128      | 0.951                   | 1.091                  | 1.131              | 0.950                   |
| 2           | 6           | 1.085          | 1.121      | 0.952                   | 1.087                  | 1.124              | 0.951                   |
| 1           | 7           | 1.081          | 1.115      | 0.954                   | 1.083                  | 1.118              | 0.953                   |

Calculations refer to a 70 kDa monomer with  $R_A = 3.55$  nm,  $R_P = 4.47$  nm.

\*Calculations based on Eqs. 11a and 11b for a monomer–dimer system ( $n = 2$ ) with virial coefficients obtained from Eqs. 7, 12a, and 12b with  $Z_A = Z_P = 0$ .

<sup>†</sup>Calculations based on Eqs. (14a)–(14c) with  $(V_A/M_A) = (4/3)\pi R_A^3$ ,  $n = 2$  and  $x = 1$ .
